# Supplementary material
Source: PubMed Central journal article supplement (PMC7212660)
Supplement: supp_RA120.013291_159222_2_supp_499427_q7rz1z.pdf [file supp_RA120.013291_159222_2_supp_499427_q7rz1z.pdf]

## Supporting Information

### Structural basis of substrate recognition and catalysis by fucosyltransferase 8

Michael Järvå<sup>1,2†</sup>, Marija Dramicanin<sup>1,2†</sup>, James P. Lingford<sup>1,2</sup>, Runyu Mao<sup>1,2</sup>, Alan John<sup>1,2</sup>,  
Kate Jarman<sup>1,2</sup>, Rhys W. Grinter<sup>3</sup>, and Ethan D. Goddard-Borger<sup>1,2\*</sup>

<sup>1</sup> The Walter and Eliza Hall Institute of Medical Research, Parkville, Victoria 3052, Australia.

<sup>2</sup> Department of Medical Biology, University of Melbourne, Parkville, Victoria 3010, Australia.

<sup>3</sup> Department of Microbiology, Monash Biomedicine Discovery Institute, Monash University, Clayton, VIC 3800, Australia.

† These authors contributed equally

\* Correspondence and requests for materials should be addressed to E.D.G.-B. ([goddard-borger.e@wehi.edu.au](mailto:goddard-borger.e@wehi.edu.au)).

```

HsFUT8      .....RNLGKGDHEILRRRIENGAKELWFFLQSELKCLKLHLEGNELQRHADEFLLD
MmFUT8      EFRRIPEGPIDQGTATGRVRLVEEQLVKAKEQIENYKKAARNLGLGKGDHEILRRRIENGAKELWFFLQSELKCLKLHLEGNELQRHADEFLLD
consensus>70 .....RNLGKGDHEILRRRIENGAKELWFFLQSELKCLKLHLEGNELQRHADE.LLD

                60          70          80          90          100         110         120         130         140
HsFUT8      LGHHERSIMTDLYYLSQTDGAGDWREKEAKDLTELVRRIITYLQNPKDCSKAKLVCNINKCGGYGCQLHHVVYCFMIAYGTORTLTLES
MmFUT8      LGHHERSIMTDLYYLSQTDGAGDWREKEAKDLTELVRRIITYLQNPKDCSKAKLVCNINKCGGYGCQLHHVVYCFMIAYGTORTLTLES
consensus>70 LGHHERSIMTDLYYLSQTDGAGDWREKEAKDLTELVRRIITYLQNPKDCSKA.KLVCNINKCGGYGCQLHHVVYCFMIAYGTORTLTLES

                150         160         170         180         190         200         210         220         230
HsFUT8      QNWRYPATGGWETVFRPVSETCTDRSGESTGHWSGEVNDKNVQVVELPIVDSLHPRPPYLPPLAVPEDLADRLRVHGDPAVWVVSQFVKYL
MmFUT8      QNWRYPATGGWETVFRPVSETCTDRSGESTGHWSGEVNDKNVQVVELPIVDSLHPRPPYLPPLAVPEDLADRLRVHGDPAVWVVSQFVKYL
consensus>70 QNWRYPATGGWETVFRPVSETCTDRSGESTGHWSGEV.DKNVQVVELPIVDSLHPRPPYLPPLAVPEDLADRLRVHGDPAVWVVSQFVKYL

                240         250         260         270         280         290         300         310         320
HsFUT8      IRPQPWLEKEIEEATKKGFKHPVIGVHVRRTDKVGTAAAFHPIEEYMVHVEHFQOLLARRMQVDKRVYLATDDPILLKEANTKYBNYE
MmFUT8      IRPQPWLEKEIEEATKKGFKHPVIGVHVRRTDKVGTAAAFHPIEEYMVHVEHFQOLLARRMQVDKRVYLATDDPILLKEANTKYBNYE
consensus>70 IRPQPWLEKEIEEATKKGFKHPVIGVHVRRTDKVGTAAAFHPIEEYMVHVEHFQOLLARRMQVDKRVYLATDDP.LLKEA.TKY.NYE

                330         340         350         360         370         380         390         400         410
HsFUT8      FISDNSTSWSAGLHNRRTENSLRGVILDIHFLSQADFLVCTFSSQVCRVAYEIMQTLHPDASANFHSISLDDIYFYGQNAHNOIAIYHPKQ
MmFUT8      FISDNSTSWSAGLHNRRTENSLRGVILDIHFLSQADFLVCTFSSQVCRVAYEIMQTLHPDASANFHSISLDDIYFYGQNAHNOIAIYHPKQ
consensus>70 FISDNSTSWSAGLHNRRTENSLRGVILDIHFLSQADFLVCTFSSQVCRVAYEIMQTLHPDASANFHSISLDDIYFYGQNAHNOIAIY.H.P

                420         430         440         450         460         470
HsFUT8      RTADEIPMEPGDIIGVAGNHWDGYSKGNRRLGRTGLYPSYKVRREKIEYTKVPTYPEAEK
MmFUT8      RTADEIPMEPGDIIGVAGNHWDGYSKGNRRLGRTGLYPSYKVRREKIEYTKVPTYPEAEK
consensus>70 RT.#EIPMEPGDIIGVAGNHWDGYSKGNRRLGRTGLYPSYKVRREKIEYTKVPTYPEAEK

```

Supplementary Figure 1. Sequence alignment of HsFUT8<sub>105-575</sub> and MmFut8<sub>68-575</sub>. The proteins are  $\approx 97\%$  identical over this region.

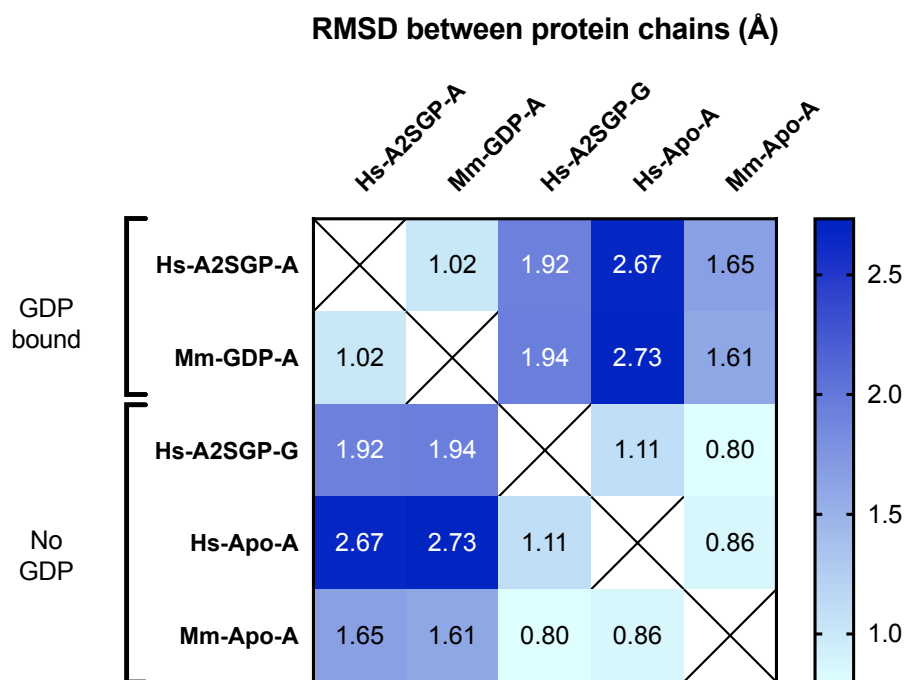

**Supplementary Figure 2.** Heatmap illustrating the RMSD between protein chains in the FUT8 structures reported in this study.

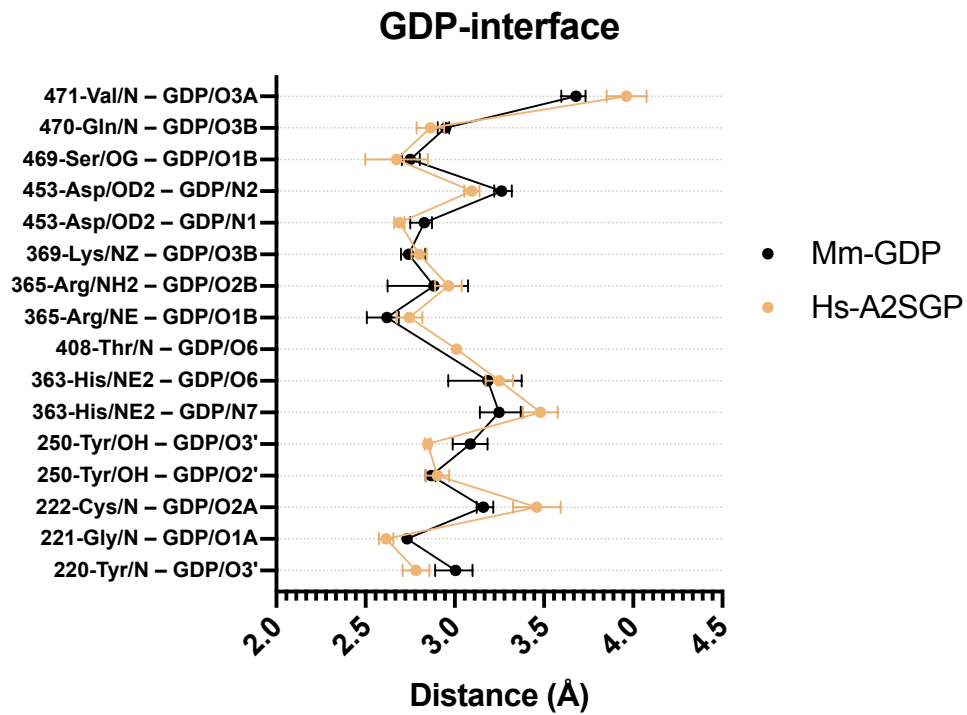

**Supplementary Figure 3.** A map of hydrogen bond distances between GDP and FUT8 for all relevant structures reported in this work.

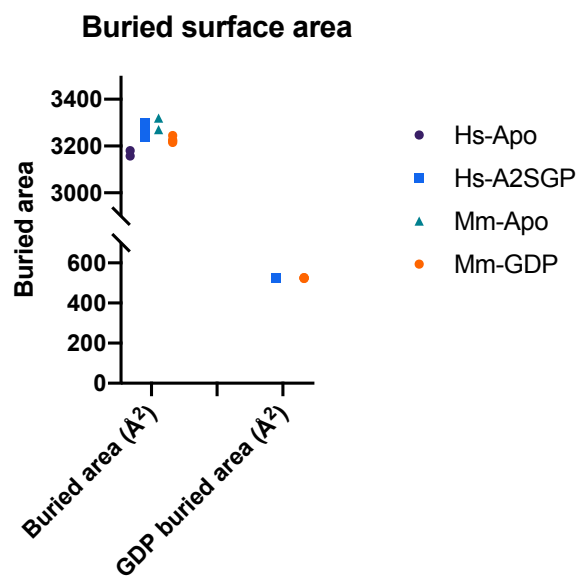

**Supplementary Figure 4.** Buried surface area of FUT8 upon dimerisation, and of GDP upon binding FUT8, for each of the structures reported in this work.

**Table S1.** The sequences of nucleotides and proteins used in this study. Restrictions sites used for cloning are underlined; signal peptides are shaded in grey; His<sub>10</sub> tags are shaded in yellow; V5 epitope tags are shaded in blue; and factor Xa sites are shaded in pink.

| protein | Synthetic dsDNA used for cloning                                                                                                                                                                                                                                                                                                                                                                                                                                                                                                                                                                                                                                                                                                                                                                                                                                                                                                                                                                                                                                                                                                                                                                                                                                                                                                                                                                                                                                                                                                                                                                                                                                                                                                                                                                                                                                                                                                                                                                                                                   | Protein sequence                                                                                                                                                                                                                                                                                                                                                                                                                                                                                                                                                                                                                                                                                                                           |
|---------|----------------------------------------------------------------------------------------------------------------------------------------------------------------------------------------------------------------------------------------------------------------------------------------------------------------------------------------------------------------------------------------------------------------------------------------------------------------------------------------------------------------------------------------------------------------------------------------------------------------------------------------------------------------------------------------------------------------------------------------------------------------------------------------------------------------------------------------------------------------------------------------------------------------------------------------------------------------------------------------------------------------------------------------------------------------------------------------------------------------------------------------------------------------------------------------------------------------------------------------------------------------------------------------------------------------------------------------------------------------------------------------------------------------------------------------------------------------------------------------------------------------------------------------------------------------------------------------------------------------------------------------------------------------------------------------------------------------------------------------------------------------------------------------------------------------------------------------------------------------------------------------------------------------------------------------------------------------------------------------------------------------------------------------------------|--------------------------------------------------------------------------------------------------------------------------------------------------------------------------------------------------------------------------------------------------------------------------------------------------------------------------------------------------------------------------------------------------------------------------------------------------------------------------------------------------------------------------------------------------------------------------------------------------------------------------------------------------------------------------------------------------------------------------------------------|
| HsFUT8  | <p>GGATCT<u>CGGGTC</u>CGAAACCATGCTACTAGTAAATCAGTCACACCAAGGCTTCA<br/> ATAAGGAACACACAAGCAAGATGGTAAAGCGCTATTGTTTTATATGTGCTTTT<br/> GGCGGCGGCGCGCATCTGCCTTTGCGGAGAATGGTCTGGGGAAGGATCAT<br/> GAAATCCTGAGGAGGAGGATTGAAAATGGAGCTAAAGAGCTCTGGTTTTCC<br/> TACAGAGTGAATTGAAGAAATTAAGAAGCTTAGAAGGAAATGAACCCAAAG<br/> ACATGCAGATGAATTTCTTTGGATTAGGACATCATGAAAGGTCTATAATG<br/> ACGGATCTATACTACCTCAGTCAGACAGATGGAGCAGGTGATTTGGCGGGAAA<br/> AAGAGCCAAAGATCTGACAGAAGCTGGTTCAGCGGAGAATAACATATCTTCA<br/> GAATCCCAAGGACTGCAGCAAAGCCAAAAGCTGGTGTGTAATATCAACAAA<br/> GGCTGTGGCTATGGCTGTGACGTCATCATGTTGGTCTACTGCTTCATGATTG<br/> CATATGGCACCAGCGAACACTCATCTTGGAAATCTCAGAATTGGCGCTATGC<br/> TACTGGTGGATGGGAGACTGTATTTAGGCCCTGTAAGTGAGACATGCACAGAC<br/> AGATCTGGCATCTCCACTGGACACTGGTCAAGTGAAGTGAAGGACAAAAATG<br/> TTCAAGTGGTGGAGCTTCCCATTTGTAGACAGTCTTCATCCCGCTCCCTCATA<br/> TTTACCCTTGGCTGTACCAGAAGACCTCGCAGATCGACTTGTACGAGTGCAT<br/> GGTAGCCCTGAGTGTGGTGGTGTCTCAGATTGTCAAAATGACTTGTATCCGCC<br/> CACAGCCTTGGCTAGAAAAGAAATAGAAGAAGCCACCAAGAAGCTTGGCTT<br/> CAAAATCCAGTTATTTGGAGTCCATGTCAGACGCACAGACAAAGTGGGAACA<br/> GAAGCTGCCTCCATCCCATGAAGAGTACATGGTGCATGTTGAAGAATTT<br/> TTACAGCTTCTTGCACGCAGAATCAAGTGGACAAAAAAGAGTGTATTTGGC<br/> CACAGATGACCTTCTTTATTAAGGAGGCCAAAACAAGTACCCCAATTAT<br/> GAATTTATTAGTGATAACTCTATTTCTGGTCAAGTGGACTGCACAAATCGAT<br/> ACACGAAAAATCACTTCGTGGAGTGATCCTGGATATACATTTCTCTCTCA<br/> GGCAGACTTCTAGTGTGTACTTTTTTCATCCAGGTCTGTGAGTTGCTTAT<br/> GAAATATGCAAACTACATCCTGTGCTTGCAGAACTTCCATTCATTTAG<br/> ATGACATCTACTATTTTGGGGGCCAGAATGCCCAATCAAAATGCCATTTA<br/> TGCTCACAAACCCGAAGTGCAGATGAAATCCCATGGAACCTGGAGATATC<br/> ATTGGTGTGGCTGGAAATCATTTGGGATGGCTATTCTAAAGGTGTCAACAGGA<br/> AATTGGGAAGGACGGGCTATATCCCTCCTACAAAGTTCGAGAGAAGATAGA<br/> AACGGTCAAGTACCCACATATCCTGAGGCTGAGAAACACCACCATCACCAT<br/> CACCATCACCATCACTGACTCGAGGCATG</p>                                                                                                                                                                                                                  | <p>MLLVNQSHQGFNKEHTSKMVSAILV<br/> YVLLAAAAHSFAFARNGLGKDHEILR<br/> RRIENGAKELWFFLQSELKCLKNLE<br/> GNELQRHADEFLLDLGHHERSIMTD<br/> LYYLSQTDGAGDWREKEAKDLTEL<br/> QRRITYLQNPKDCSKAKKLVCNINK<br/> GCGYGCQLHHVVYCFMAYGTQRTL<br/> ILESQNWRYATGGWETVFRPVSETC<br/> TDRSGISTGHWSEVVDKKNVQVVEL<br/> PIVDSLHPRPPYLPVAVPEDLADRL<br/> VRVHGDPAVWVWSQFVKYLIRPQPV<br/> LEKEIEEATKKLGFKHPVIGVHVR<br/> TDKVGTEAAFHPVIEEYMVHVEEHFQ<br/> LLARRMQVDDKRVYLATDDPSSLKE<br/> AKTKYPNYEFISDNSISWSAGLHNR<br/> YTENSLRGVILDIHFLSQDFLVCT<br/> FSSQVCRVAYEIMQTLHPDASANFH<br/> SLDDIYFYGQNAHNQIAIYAHQPR<br/> TADEIPMEPGDIIIGVAGNHWDGYSK<br/> GVNRKLGRTGLYPSYKVRKIEYTVK<br/> YPTYPEAEKHHHHHHHHHH</p>                                                                       |
| MmFUT8  | <p>GGATCT<u>CGGGTC</u>CGAAACCATGCTACTAGTAAATCAGTCACACCAAGGCTTCA<br/> ATAAGGAACACACAAGCAAGATGGTAAAGCGCTATTGTTTTATATGTGCTTTT<br/> GGCGGCGGCGCGCATCTGCCTTTGCGGCGGATCTTGGATCCCAACCATCAT<br/> CACCACCATCACCACCATCAGCGCAAACCAATTTCCCAACCTTTGCTGGGAC<br/> TGGATTCACATATAGACGGCGTGAATTCGGAATACAGAAGGCCCAATTTGA<br/> CCAGGGGACAGCTACAGGAAGAGTCCCGTGTTTAGAAGAAGAGCTTGTAAAG<br/> GCCAAAGAACAGATTGAAAATTAACAAGAAACAGCTAGAAAATGGTCTGGGGA<br/> AGGATCATGAAATCTTAAGAAGGAGGATTGAAAATGGAGCTAAAGAGCTCTG<br/> GTTTTTCTACAAAGCGAAGTGAAGAAATTAAGCATTTAGAAGGAAATGAA<br/> CTCAAAGACATGCAGATGAAATCTTTGGATTAGGACACCATGAAAGGT<br/> CTATCATGACAGATCTATACTACCTCAGTCAAACAGATGGAGCAGGGGATTG<br/> GCGTGAAGAAAGAGGCAAAGATCTGACAGAGCTGGTCCAGCGGAGAATAACA<br/> TATCTCCAGAATCTTAAGGACTGCAGCAAAGCCAGGAAGCTGGTGTGTAACA<br/> TCAATAAAGGCTGTGGCTATGGTGTCAACTCCATCAGTGGTCTACTGTTT<br/> CATGATTGCTTATGGCACCCAGCGAACACTCATCTTGAATCTCAGAATTGG<br/> CGCTATGCTACTGGTGGATGGGAGACTGTGTTTAGACCTGTAAGTGAGACAT<br/> GTACAGACAGATCTGGCCTCTCCACTGGACACTGGTCAAGTGAAGTAAATGA<br/> CAAAAACATTCAGTGGTGGTCCGAGCTCCCATTTGTAGACAGCTCCATCCTCGG<br/> CCTCCTTACTTACCCTGGCTGTCCAGAAGACCTTGCAGACCGACTCCTAA<br/> GAGTCCATGGTGACCTGCAGTGTGGTGGGTGTCCAGTTTGTCAAATACTT<br/> GATTCGTCCACAACCTTGGCTGGAAAAGGAAATAGAAGAAGCCCAAGAAG<br/> CTTGGCTTCAAACATCCAGTTATTGGAGTCCATGTCAGACGCACAGACAAAG<br/> TGGGAACAGAAGCAGCTTCCACCCATCGAGGAGTACATGGTACACGTTGA<br/> ACAACATTTTCACTTCTCGCAGCAGAATGCAAGTGGATAAAAAAGAGTA<br/> TATCTGGCTACTGATGATCCTACTTTGTTAAAGGAGGCCAAACACAAAGTACT<br/> CCAATGAAATTTATAGTGATAACTCTATTTCTTGGTCACTGGACTGACTACA<br/> CAATCGGTACACAGAAAATCACTTCCGGGTGTGATCCTGGATATACACTTT<br/> CTCTCACAGGCTGACTTTCTAGTGTGACTTTTTTCATCCAGGTCTGTGGG<br/> TTGCTTATGAAATCATGCAAACCTGCATCCTGATGCTCTGCGAATCTCCA<br/> TTCTTTGGATGACATCTACTATTTTGGAGGCCAAAATGCCACAATCAGATT<br/> GCTGTTTATCCTCACAAACCTCGAAGTGAAGAGGAAATCCAAATGGAACCTG<br/> GAGATATCATTTGGTGTGGCTGGAAACCATTTGGGATGGTTATTTCAAAGGTAT<br/> CAACGAAAACCTTGGAAAACAGGCTTATATCCCTCCTACAAAGTCCGAGAG<br/> AAGATAGAAACAGTCAAGTATCCACATATCTGAAGCTGAAAAATAGCTCG<br/> AGGCATG</p> | <p>MLLVNQSHQGFNKEHTSKMVSAILV<br/> YVLLAAAAHSFAADLGSHHHHHHH<br/> HHHGKPIPNPLGLDSTIDGRFRI<br/> PEGPIDQGTATGRVVRVLEEQLVKAK<br/> EQIENYKQARNGLGKDHEILRRRI<br/> ENGAKELWFFLQSELKCLKHLEGN<br/> LQRHADEFLLDLGHHERSIMTDLY<br/> LSQTDGAGDWREKEAKDLTELQRR<br/> ITYLQNPKDCSKARKLVCNINKGCG<br/> YGCQLHHVVYCFMAYGTQRTLILE<br/> SQNWRYATGGWETVFRPVSETCTDR<br/> SGLSTGHWSEVVDKNIQVVELPIV<br/> DSLHPRPPYLPVAVPEDLADRLR<br/> HGDPVWVWSQFVKYLIRPQVLEK<br/> EIEEATKKLGFKHPVIGVHVRRTDK<br/> VGTEAAFHPVIEEYMVHVEQHFQLLA<br/> RRMQVDDKRVYLATDDPPLLKEANT<br/> KYSNYEFISDNSISWSAGLHNRYTE<br/> NSLRGVILDIHFLSQADFLVCTFSS<br/> QVCRVAYEIMQTLHPDASANFHSLD<br/> DIYFYGQNAHNQIAVYHPKPRTEE<br/> EIPMEPGDIIIGVAGNHWDGYSKIN<br/> RKLKGTGLYPSYKVRKIEYTVKYPT<br/> YPEAEK</p> |
